# Supplementary material for: Murine Salivary Amylase Protects Against Streptococcus mutans-Induced Caries
Source: Frontiers journal article supplement (doi:10.3389/fphys.2021.699104), 2021-07-02
Supplement: Image_1.PDF [file Image_1.PDF]

|         | 10   | 20   | 30             | 40           | 50                                 | 60        | 70     | 80      | 90                   | 100 |
|---------|------|------|----------------|--------------|------------------------------------|-----------|--------|---------|----------------------|-----|
| Amy1 V1 | MKFF | LLLL | SLIGFCWAQYDPHT | <b>QY</b> GR | TAIVHLFEWRWVDIAKECERYLAPNGFAGVQVSP | PNNENIVVH | SPSRPW | WERYQPI | SYKICSRSGNEDEFRDMVNR |     |
| Amy1 V2 | MKFF | LLLL | SLIGFCWAQYDPHT | <b>QY</b> GR | TAIVHLFEWRWVDIAKECERYLAPNGFAGVQVSP | PNNENIVVH | SPSRPW | WERYQPI | SYKICSRSGNEDEFRDMVNR |     |
| Amy2a1  | MKFV | LLLL | SLIGFCWAQYDPHT | SDGR         | TAIVHLFEWRWVDIAKECERYLAPKGGFVQVSP  | PNNENIVVH | NSRP   | WERYQPI | SYKICTRSGNEDEFRDMVTR |     |
| Amy2a2  | MKFV | LLLL | SLIGFCWAQYDPHT | SDGR         | TAIVHLFEWRWVDIAKECERYLAPKGGFVQVSP  | PNNENIVVH | NSRP   | WERYQPI | SYKICTRSGNEDEFRDMVTR |     |
| Amy2a3  | MKFV | LLLL | SLIGFCWAQYDPHT | SDGR         | TAIVHLFEWRWVDIAKECERYLAPKGGFVQVSP  | PNNENIVVH | NSRP   | WERYQPI | SYKICTRSGNEDEFRDMVTR |     |
| Amy2a4  | MKFV | LLLL | SLIGFCWAQYDPHT | SDGR         | TAIVHLFEWRWVDIAKECERYLAPKGGFVQVSP  | PNNENIVVH | NSRP   | WERYQPI | SYKICTRSGNEDEFRDMVTR |     |
| Amy2a5  | MKFV | LLLL | SLIGFCWAQYDPHT | SDGR         | TAIVHLFEWRWVDIAKECERYLAPKGGFVQVSP  | PNNENIVVH | NSRP   | WERYQPI | SYKICTRSGNEDEFRDMVTR |     |
| Amy2b   | MKFV | LLLL | SLIGFCWAQYDPHT | SDGR         | TAIVHLFEWRWVDIAKECERYLAPKGGFVQVSP  | PNNENIVIH | NSRP   | WERYQPI | SYKICTRSGNEDEFRDMVTR |     |

  

|         | 110   | 120    | 130               | 140         | 150            | 160   | 170  | 180  | 190        | 200                |
|---------|-------|--------|-------------------|-------------|----------------|-------|------|------|------------|--------------------|
| Amy1 V1 | CNNVG | VRIYVD | AVINHMCGVGAQAGQSS | TCGSYFNPNNR | DFFG           | VPYS  | SGFD | FN   | DKC        | RTASGGIENYQDAAQVRD |
| Amy1 V2 | CNNVG | VRIYVD | AVINHMCGVGAQAGQSS | TCGSYFNPNNR | DFFG           | VPYS  | SGFD | FN   | DKC        | RTASGGIENYQDAAQVRD |
| Amy2a1  | CNNVG | VRIYVD | AVINHMCGAGNPAGT   | SSTCGSYLNPN | NREFPAVPYSAWDF | NDNKC | ---  | GEID | NYNDAYQVRN | CRLTGLL            |
| Amy2a2  | CNNVG | VRIYVD | AVINHMCGAGNPAGT   | SSTCGSYLNPN | NREFPAVPYSAWDF | NDNKC | ---  | GEID | NYNDAYQVRN | CRLTGLL            |
| Amy2a3  | CNNVG | VRIYVD | AVINHMCGAGNPAGT   | SSTCGSYLNPN | NREFPAVPYSAWDF | NDNKC | ---  | GEID | NYNDAYQVRN | CRLTGLL            |
| Amy2a4  | CNNVG | VRIYVD | AVINHMCGAGNPAGT   | SSTCGSYLNPN | NREFPAVPYSAWDF | NDNKC | ---  | GEID | NYNDAYQVRN | CRLTGLL            |
| Amy2a5  | CNNVG | VRIYVD | AVINHMCGAGNPAGT   | SSTCGSYLNPN | NREFPAVPYSAWDF | NDNKC | ---  | GEID | NYNDAYQVRN | CRLTGLL            |
| Amy2b   | CNNVG | VRIYVD | AVINHMCGSGNPAGT   | SSTCGSYLNPN | NREFPAVPYSAWDF | NDNKC | ---  | GEIS | NYNDAYQVRN | CRLSGLL            |

  

|         | 210   | 220     | 230             | 240        | 250   | 260   | 270   | 280   | 290                    | 300          |
|---------|-------|---------|-----------------|------------|-------|-------|-------|-------|------------------------|--------------|
| Amy1 V1 | LIDIG | VAGFRLD | ASKHMWPGDIKAILD | KLHNLNTKWF | SQGS  | RPFI  | FQ    | EV    | IDL                    | LGGEAVSSNE   |
| Amy1 V2 | LIDIG | VAGFRLD | ASKHMWPGDIKAILD | KLHNLNTKWF | SQGS  | RPFI  | FQ    | EV    | IDL                    | LGGEAVSSNE   |
| Amy2a1  | LIDIG | VAGFRLD | AAKHMWPGDIKAVLD | KLHNLNTKWF | SQGS  | RPFI  | FQ    | EV    | QYIIFKILILLFNYSVSSFFIP | PHTSMYLSAVT  |
| Amy2a2  | LIDIG | VAGFRLD | AAKHMWPGDIKAVLD | KLHNLNTKWF | SQGS  | RPFI  | FQ    | EV    | IDL                    | LGGEAIKGYFNG |
| Amy2a3  | LIDIG | VAGFRLD | AAKHMWPGDIKAVLD | KLHNLNTKWF | SQGS  | RPFI  | FQ    | EV    | IDL                    | LGGEAIKGYFNG |
| Amy2a4  | LIDIG | VAGFRLD | AAKHMWPGDIKAVLD | KLHNLNTKWF | SQGS  | RPFI  | FQ    | EV    | IDL                    | LGGEAIKGYFNG |
| Amy2a5  | LIDIG | VAGFRLD | AAKHMWPGDIKAVLD | KLHNLNTKWF | SQGS  | RPFI  | FQ    | EV    | IDL                    | LGGEAIKGYFNG |
| Amy2b   | ----- | -----   | -----           | -----      | ----- | ----- | ----- | ----- | -----                  | -----        |

  

|         | 310 | 320       | 330   | 340       | 350    | 360       | 370          | 380    | 390       | 400       |
|---------|-----|-----------|-------|-----------|--------|-----------|--------------|--------|-----------|-----------|
| Amy1 V1 | LMP | SDRALVFVD | NHDNQ | RGHGAGGAS | ILTFWD | ARLYKMAVG | FMLAHPYGFTRV | MSSYWP | RNFQNGKD  | VNDWVGPPN |
| Amy1 V2 | LMP | SDRALVFVD | NHDNQ | RGHGAGGAS | ILTFWD | ARLYKMAVG | FMLAHPYGFTRV | MSSYWP | RNFQNGKD  | VNDWVGPPN |
| Amy2a1  | LVP | SDRALVFVD | NHDNQ | RGHGAGGSS | ILTFWD | ARMYKMAVG | FMLAHPYGFTRV | MSSYWR | NRNFQNGKD | QNDWIGPPN |
| Amy2a2  | LVP | SDRALVFVD | NHDNQ | RGHGAGGSS | ILTFWD | ARMYKMAVG | FMLAHPYGFTRV | MSSYWR | NRNFQNGKD | QNDWIGPPN |
| Amy2a3  | LVP | SDRALVFVD | NHDNQ | RGHGAGGSS | ILTFWD | ARMYKMAVG | FMLAHPYGFTRV | MSSYWR | NRNFQNGKD | QNDWIGPPN |
| Amy2a4  | LVP | SDRALVFVD | NHDNQ | RGHGAGGSS | ILTFWD | ARMYKMAVG | FMLAHPYGFTRV | MSSYWR | NRNFQNGKD | QNDWIGPPN |
| Amy2a5  | LVP | SDRALVFVD | NHDNQ | RGHGAGGSS | ILTFWD | ARMYKMAVG | FMLAHPYGFTRV | MSSYWR | NRNFQNGKD | QNDWIGPPN |
| Amy2b   | LVP | SDRALVFVD | NHDNQ | RGHGAGGSS | ILTFWD | ARMYKMAVG | FMLAHPYGFTRV | MSSYWR | NRNFQNGKD | QNDWIGPPN |

  

|         | 410 | 420       | 430      | 440    | 450      | 460     | 470  | 480     | 490  | 500                                          |
|---------|-----|-----------|----------|--------|----------|---------|------|---------|------|----------------------------------------------|
| Amy1 V1 | HRW | RQIRNMVAF | RNVVNGQP | FANWWD | NDSNQVAF | GRGNKGF | IVFN | NDDWALS | ETLQ | TGLPAGTYCDVISGDKVDGNCTGIKVYV                 |
| Amy1 V2 | HRW | RQIRNMVAF | RNVVNGQP | FANWWD | NDSNQVAF | GRGNKGF | IVFN | NDDWALS | ETLQ | TGLPAGTYCDVISGDKVDGNCTGIKVYV                 |
| Amy2a1  | HRW | RQIRNMVAF | RNVVNGQP | FANWWD | NDSNQVAF | GRGNKGF | IVFN | NDDWALS | ETLQ | TGLPAGTYCDVISGDKVDGNCTGLRVNVGSDGKAHFSISNSAED |
| Amy2a2  | HRW | RQIRNMVAF | RNVVNGQP | FANWWD | NDSNQVAF | GRGNKGF | IVFN | NDDWALS | ETLQ | TGLPAGTYCDVISGDKVDGNCTGLRVNVGSDGKAHFSISNSAED |
| Amy2a3  | HRW | RQIRNMVAF | RNVVNGQP | FANWWD | NDSNQVAF | GRGNKGF | IVFN | NDDWALS | ETLQ | TGLPAGTYCDVISGDKVDGNCTGLRVNVGSDGKAHFSISNSAED |
| Amy2a4  | HRW | RQIRNMVAF | RNVVNGQP | FANWWD | NDSNQVAF | GRGNKGF | IVFN | NDDWALS | ETLQ | TGLPAGTYCDVISGDKVDGNCTGLRVNVGSDGKAHFSISNSAED |
| Amy2a5  | HRW | RQIRNMVAF | RNVVNGQP | FANWWD | NDSNQVAF | GRGNKGF | IVFN | NDDWALS | ETLQ | TGLPAGTYCDVISGDKVDGNCTGLRVNVGSDGKAHFSISNSAED |
| Amy2b   | HRW | RQIRNMVAF | RNVVNGQP | FANWWD | NDSNQVAF | GRGNKGF | IVFN | NDDWALS | ETLQ | TGLPAGTYCDVISGDKVDGNCTGLRVNVGSDGKAHFSISNSAED |

  

|         | 510                  |
|---------|----------------------|
| Amy1 V1 | PFFIAIHAE <b>SKI</b> |
| Amy1 V2 | PFFIAIHAE <b>SKI</b> |
| Amy2a1  | PFFIAIHAD <b>SKL</b> |
| Amy2a2  | PFFIAIHAD <b>SKL</b> |
| Amy2a3  | PFFIAIHAD <b>SKL</b> |
| Amy2a4  | PFFIAIHAD <b>SKL</b> |
| Amy2a5  | PFFIAIHAD <b>SKL</b> |
| Amy2b   | PFFIAIHAD <b>SKL</b> |

**Supplemental Figure 1.** ClustalW alignments of predicted protein sequences of mouse amylase proteins: Amy1 V1 (NP\_031472.2), Amy1 V2 (NP\_001110505.1), Amy2a1 (XP\_011238675.1), Amy2a2 (NP\_001153624.1), Amy2a3 (NP\_001153623.1), Amy2a4 (NP\_001153622.1), Amy2a5 (NP\_001036176.1) and Amy2b (NP\_001177332.1). Bold indicates mis-aligned residues. 53 non-identical residues between Amy1 and the full-length Amy2 proteins (Amy2a2, Amy2a3, Amy2a4 and Amy2a5), including a 3 residue deletion in Amy2 proteins. All full-length Amy2 proteins are of identical sequence. Amy2b is of identical sequence except for deletion of 55 internal residues, plus a single residue substitution (A for S). Amy2a1 is a 3'-end truncated protein with an additional 35 residues at its 3'-end. ClustalW multiple alignment parameters: open gap penalty, 30; extend gap penalty, 5.0; delay divergent, 30%; gap distance, 4; similarity matrix, gonnet.
